# Supplementary material for: Global Transcriptional and Phenotypic Analyses of Escherichia coli O157:H7 Strain Xuzhou21 and Its pO157_Sal Cured Mutant
Source: PLoS One. 2013 May 30;8(5):e65466. doi: 10.1371/journal.pone.0065466 (PMC3667801; doi:10.1371/journal.pone.0065466)
Supplement: Table S1 — Down-/up-regulated genes in Xuzhou21. (XLS) [file pone.0065466.s001.xls]

## Sheet: down-regulate genes
Table S1A. Down-regulated genes by pO157_Sal
Gene name	Xuzhou21	Xuzhou21m	log2	P_value	Description	Function_class_defination	COG_class_defination
Amino acid transport and metabolism
CDCO157_4782	9.48388	21.6501	1.19082	0.0108269	Arginine:agmatin antiporter	Amino acid transport and metabolism	Amino acid transporters
CDCO157_3212	21.2743	50.6115	1.25036	0.0155595	Cysteine/O-acetylserine efflux protein; Putative threonine efflux protein	Amino acid transport and metabolism	Putative threonine efflux protein
CDCO157_3178	3.6993	14.5177	1.97249	0.0191991	Threonine dehydrogenase and related Zn-dependent dehydrogenases	Amino acid transport and metabolism	Threonine dehydrogenase and related Zn-dependent dehydrogenases
CDCO157_2233	3.25925	12.7901	1.97241	0.0192037	Quinate/shikimate dehydrogenase aroE	Amino acid transport and metabolism	Shikimate 5-dehydrogenase
CDCO157_4682	6.2936	14.9662	1.24975	0.0221317	Putative L-sorbose 1-phosphate dehydrogenase (reductase); Threonine dehydrogenase and related Zn-dependent dehydrogenases	Amino acid transport and metabolism	Threonine dehydrogenase and related Zn-dependent dehydrogenases
CDCO157_2590	0	15.6498	1.79769e+308	0.0416323	Ethanolamine utilization protein	Amino acid transport and metabolism	Ethanolamine utilization protein
Carbohydrate transport and metabolism
CDCO157_3998	25.1264	54.464	1.1161	0.00233018	High-affinity transport permease for gluconate gntT	Carbohydrate transport and metabolism	H+/gluconate symporter and related permeases
CDCO157_4022	12.2963	28.3402	1.20463	0.00546465	Low affinity gluconate transporter gntU	Carbohydrate transport and metabolism	H+/gluconate symporter and related permeases
CDCO157_4023	50.6093	110.782	1.13024	0.00671435	gluconate kinase 1 gntK	Carbohydrate transport and metabolism	Gluconate kinase
CDCO157_1631	21.538	45.2076	1.06968	0.0337774	Dihydroxyacetone kinase ADP-binding subunit	Carbohydrate transport and metabolism	Dihydroxyacetone kinase
CDCO157_4568	6.9646	17.3927	1.32037	0.044076	Rhamnulose-1-phosphate aldolase	Carbohydrate transport and metabolism	Ribulose-5-phosphate 4-epimerase and related epimerases and aldolases
CDCO157_1215	4.13778	10.5413	1.34913	0.0107565	Predicted xylanase/chitin deacetylase	Carbohydrate transport and metabolism	Predicted xylanase/chitin deacetylase
CDCO157_1378	5.35506	12.225	1.19086	0.0454831	Permeases of the major facilitator superfamily	Carbohydrate transport and metabolism	Permeases of the major facilitator superfamily
CDCO157_1866	20.2709	40.4944	0.998314	0.0177657	glyceraldehyde 3-phosphate dehydrogenase C	Carbohydrate transport and metabolism	Glyceraldehyde-3-phosphate dehydrogenase/erythrose-4-phosphate dehydrogenase
Lipid transport and metabolism
CDCO157_4982	8.6374	23.2831	1.43062	0.0195305	Activator of 2-hydroxyglutaryl-CoA dehydratase (HSP70-class ATPase domain)	Lipid transport and metabolism	Activator of 2-hydroxyglutaryl-CoA dehydratase (HSP70-class ATPase domain)
CDCO157_3514	20.567	42.9101	1.06099	0.0498727	Isopentenyl-diphosphate delta-isomerase	Lipid transport and metabolism	Isopentenyldiphosphate isomerase
nucleotide transport and metabolism
CDCO157_2062	6.08325	16.2041	1.41344	0.0383853	Putative transposase	Nucleotide transport and metabolism
CDCO157_3193	37.7283	74.9344	0.989979	0.0297984	tRNA-specific adenosine deaminase	Nucleotide transport and metabolism	Cytosine/adenosine deaminases
Inorganic ion transport and metabolism
CDCO157_1916	0	11.0034	1.79769e+308	7.19649e-05	nitrate/nitrite transporter narU	Inorganic ion transport and metabolism	Nitrate/nitrite transporter
CDCO157_4124	2.8637	17.7093	2.62855	0.00444733	ABC-type hemin transport system; ATPase component	Inorganic ion transport and metabolism	ABC-type hemin transport system, ATPase component
CDCO157_0992	17.2748	42.4575	1.29735	0.00685131	ABC-type nitrate/sulfonate/bicarbonate transport system; ATPase component	Inorganic ion transport and metabolism	ABC-type nitrate/sulfonate/bicarbonate transport system, ATPase component
CDCO157_3655	4.45918	14.5433	1.70551	0.0104537	ABC-type Fe3+-siderophore transport system; permease component	Inorganic ion transport and metabolism	ABC-type Fe3+-siderophore transport system, permease component
CDCO157_3365	9.66059	19.4218	1.00749	0.0300637	sulfate adenylyltransferase subunit 1 cysN	Inorganic ion transport and metabolism	GTPases - Sulfate adenylate transferase subunit 1
Cell motility
CDCO157_0107	14.0074	29.9788	1.09776	0.0120639	Type IV pilin biogenesis protein	Cell motility	Type II secretory pathway, component PulF
CDCO157_1572	1.00863	10.0761	3.32047	0.0313246	Major tail protein V component of prophage CP-933X	Cell motility	Bacterial surface proteins containing Ig-like domains
CDCO157_0143	2.77038	13.8403	2.32072	0.0448264	Putative fimbrial-like protein; P pilus assembly protein, pilin FimA	Cell motility	P pilus assembly protein, pilin FimA
CDCO157_1222	1.27602	10.9276	3.09826	0.0467848	P pilus assembly protein, chaperone PapD	Cell motility	P pilus assembly protein, chaperone PapD
CDCO157_4959	1.22342	10.4769	3.09822	0.0467874	P pilus assembly protein, pilin FimA	Cell motility	P pilus assembly protein, pilin FimA
Cell wall/membrane/envelope biogenesis
CDCO157_0361	10.0316	25.3724	1.33871	0.00302881	Putative deaminase; Cytosine deaminase and related metal-dependent hydrolases	Cell wall/membrane/envelope biogenesis	Cytosine deaminase and related metal-dependent hydrolases
CDCO157_3335	3.83884	13.696	1.83501	0.0315588	Formate hydrogenlyase subunit-7 component G; Ni,Fe-hydrogenase III small subunit	Cell wall/membrane/envelope biogenesis	Ni,Fe-hydrogenase III small subunit
Energy production and conversion
CDCO157_3264	6.47284	22.1731	1.77634	0.0207146	Putative antitermination protein	Energy production and conversion
General function prediction only
CDCO157_2689	7.50499	20.2294	1.43053	0.0195378	ABC-type uncharacterized transport system, permease component; nickel/cobalt efflux protein RcnA	General function prediction only	ABC-type uncharacterized transport system, permease component
CDCO157_4323	134.429	268.836	0.999878	0.00869951	ler	General function prediction only	DNA-binding protein H-NS
CDCO157_3356	418.237	962.033	1.20176	0.000138375	Lipoprotein NlpD; Membrane proteins related to metalloendopeptidases	General function prediction only	Membrane proteins related to metalloendopeptidases
CDCO157_2167	157.318	401.559	1.35193	0.0278034	oriC-binding nucleoid-associated protein	General function prediction only
Posttranslational modification, protein turnover, chaperones
CDCO157_4991	0	46.3415	1.79769e+308	0.00233887	Endoribonuclease SymE	Posttranslational modification, protein turnover, chaperones
Replication, recombination and repair
CDCO157_1278	0	17.6573	1.79769e+308	0.0013499	Transposase and inactivated derivatives	Replication, recombination and repair	Transposase and inactivated derivatives
CDCO157_2492	26.744	64.6223	1.27282	0.016253	DNA mismatch endonuclease	Replication, recombination and repair	DNA G:T-mismatch repair endonuclease
CDCO157_2312	11.4333	26.8005	1.22902	0.018624	Putative transposase; Transposase and inactivated derivatives	Replication, recombination and repair	Transposase and inactivated derivatives
CDCO157_2559	12.5061	25.3584	1.01984	0.0277331	Putative integrase; site-specific recombinase, phage integrase family	Replication, recombination and repair	Integrase
CDCO157_0878	9.30923	25.461	1.45155	0.0067908	Putative pyruvate formate-lyase 2 activating enzyme	Replication, recombination and repair	Pyruvate-formate lyase-activating enzyme
CDCO157_1830	5.26024	22.529	2.09858	0.0291142	O-6-alkylguanine-DNA:cysteine-protein methyltransferase	Replication, recombination and repair	Methylated DNA-protein cysteine methyltransferase
RNA processing and modification
CDCO157_0383	2.66667	15.225	2.51333	0.0275515	galactoside O-acetyltransferase lacA	RNA processing and modification	Acetyltransferase (isoleucine patch superfamily)
Secondary metabolites biosynthesis, transport and catabolism
CDCO157_1223	7.1319	18.9944	1.41322	0.00541079	Putative outer membrane protein	Secondary metabolites biosynthesis, transport and catabolism
Signal transduction mechanisms
CDCO157_3650	25.0048	57.7807	1.20838	0.00879569	DNA-binding transcriptional regulator QseB; two-component system, OmpR family, response regulator QseB	Signal transduction mechanisms	Response regulators consisting of a CheY-like receiver domain and a winged-helix DNA-binding domain
CDCO157_4004	13.0199	27.867	1.09783	0.0198086	RNA 3'-terminal-phosphate cyclase	Signal transduction mechanisms	RNA 3'-terminal phosphate cyclase
transcription
CDCO157_4360	3.16949	13.5701	2.09811	0.0291504	Putative transcriptional regulator; GntR family	Transcription	Transcriptional regulators
CDCO157_0379	19.3942	38.745	0.998382	0.0249426	DNA-binding transcriptional regulator cynR	Transcription	Transcriptional regulator
virulence/T3SS effector
CDCpO157_0020	26.5246	53.3534	1.00825	0.0048612	Enterohemolysin D		Membrane-fusion protein
CDCO157_4298	48.2637	111.136	1.20331	0.00818165	LEE-encoded effector EspH
CDCO157_4284	16.8471	51.1175	1.60132	0.0117794	LEE-encoded type III secreted effector; EspF
CDCO157_4324	16.8028	34.8016	1.05045	0.0116513	LEE-encoded type III secreted effector; EspG
CDCO157_0460	8.24559	16.2457	0.978359	0.0377252	espY3; non-LEE-encoded type III secreted effector	Function unknown	Uncharacterized low-complexity proteins
others
CDCO157_0303	4.17643	28.3119	2.76106	0.000633308	Putative oxidoreductase; clavaldehyde dehydrogenase; Short-chain alcohol dehydrogenase of unknown specificity		Short-chain alcohol dehydrogenase of unknown specificity
CDCO157_4888	276.069	553.492	1.00353	0.0171787	Antitoxin ChpS		Growth regulator
CDCO157_1556	17.0487	42.601	1.32123	0.0439393	Putative endopeptidase
CDCO157_1356	4.31379	21.5587	2.32125	0.0447782	Cryptic curlin major subunit
CDCO157_3583	39.5658	100.473	1.34449	0.000158788	Putative alpha helix chain
CDCO157_2807	5.07918	14.4942	1.51281	0.0124182	Predicted membrane protein		Predicted membrane protein
CDCO157_0299	23.2875	99.87	2.1005	0.00554404	Cnr-like protein
CDCO157_1967	5.66342	15.1524	1.4198	0.0279825	Putative membrane protein		Predicted membrane protein
CDCO157_3764	53.3726	107.69	1.01271	0.015156	Truncated putative fimbrial protein
CDCO157_4155	211.532	609.365	1.52643	0.0255436	Cellulose biosynthesis protein BcsF
CDCO157_3179	0	64.3699	1.79769e+308	0.0416323	Zn-dependent dehydrogenase
CDCO157_3001	9.92042	40.9018	2.04369	0.000448225	Putative replication protein
CDCO157_2719	5.69015	28.4464	2.32171	0.0447354	Putative minor tail protein U; putative tail fiber component U of prophage CP-933U
CDCO157_2983	0	14.6869	1.79769e+308	0.0126737	Putative minor fimbrial subunit
CDCO157_0789	5.54349	18.4615	1.73566	0.0410281	Phage recombination protein Bet
CDCO157_0619	2.47845	10.6103	2.09795	0.0291624	2,3-dihydro-2,3-dihydroxybenzoate synthetase; enterobactin isochorismatase		Isochorismate hydrolase
CDCO157_1152	34.6301	97.2019	1.48896	0.00339489	Antitermination protein Q
CDCO157_3740	0	17.0047	1.79769e+308	0.0416323	DNA-binding transcriptional activator TdcR; threonine dehydratase operon activator protein
CDCO157_0292	68.9201	175.365	1.34736	0.0283347	Ogr family transcription activator
CDCpO157_0075	201.069	393.158	0.967418	0.022164	CopG-family putative DNA binding protein
function unknown
CDCO157_4879	7.34193	26.1913	1.83485	0.00113949	Hypothetical protein
CDCO157_0670	0	10.7458	1.79769e+308	0.00407549	Hypothetical protein
CDCO157_4031	51.17	119.571	1.2245	0.00735933	Hypothetical protein
CDCpO157_0051	9.08875	32.4347	1.83538	0.00974045	Hypothetical protein
CDCO157_1022	1.1828	16.8814	3.83516	0.011257	Hypothetical protein		Uncharacterized protein conserved in bacteria
CDCO157_1041	23.6391	67.5189	1.51412	0.0119954	Hypothetical protein
CDCO157_4118	0	148.601	1.79769e+308	0.0126737	Hypothetical protein
CDCO157_0712	5.3659	25.5354	2.25061	0.0177971	Hypothetical protein		Uncharacterized conserved protein
CDCO157_1127	3.88371	18.4776	2.25027	0.0178141	Hypothetical protein
CDCO157_4320	21.992	49.048	1.15722	0.0222503	Hypothetical protein
CDCO157_1089	103.113	238.426	1.20932	0.0229669	Hypothetical protein
CDCO157_2773	22.6023	129.566	2.51915	0.0271947	Hypothetical protein
CDCO157_0011	8.50241	22.7518	1.42004	0.027956	Hypothetical protein		Uncharacterized protein conserved in bacteria
CDCO157_0846	7.76133	20.7679	1.41998	0.0279629	Hypothetical protein		Metal-dependent hydrolase
CDCO157_1864	19.0261	38.7876	1.02762	0.028403	Hypothetical protein		Uncharacterized conserved protein
CDCO157_2731	10.3803	104.101	3.32605	0.031041	Hypothetical protein
CDCO157_1131	10.7086	36.2803	1.76041	0.0311505	Hypothetical protein
CDCO157_1143	103.113	227.072	1.13893	0.0328877	Hypothetical protein
CDCO157_0862	13.7869	43.322	1.6518	0.0337725	Hypothetical protein
CDCO157_2549	11.8483	23.976	1.01691	0.0395248	Hypothetical protein		Pyocin large subunit
CDCO157_1371	0	566.246	1.79769e+308	0.0416323	Hypothetical protein
CDCO157_1479	0	67.735	1.79769e+308	0.0416323	Hypothetical protein
CDCO157_3536	0	58.3454	1.79769e+308	0.0416323	Hypothetical protein
CDCO157_1171	21.2071	45.4086	1.09842	0.0422993	Hypothetical protein
CDCO157_4153	332.407	739.943	1.15446	0.0455194	Hypothetical protein
CDCO157_1886	322.484	678.019	1.0721	0.0475258	Hypothetical protein
CDCO157_3606	25.8951	50.152	0.953629	0.0269929	hypothetical protein	Replication, recombination and repair	Transposase and inactivated derivatives
CDCO157_4011	24.741	49.048	0.987292	0.0459943	hypothetical protein

## Sheet: up-regulate genes
Table S1B. Up-regulated genes by pO157_Sal
Gene name	Xuzhou21	Xuzhou21m	log2	P_value	gene product and/or function	Function_class_defination	COG_class_defination
Amino acid transport and metabolism
CDCO157_0676	42.5589	19.2583	-1.14398	0.0200019	ATP-binding protein of glutamate/aspartate ABC-type transport system	Amino acid transport and metabolism	ABC-type polar amino acid transport system, ATPase component
CDCO157_2958	28.0359	10.6692	-1.39383	0.0197111	Lysine/arginine/ornithine transporter subunit ; periplasmic-binding component of ABC superfamily	Amino acid transport and metabolism	ABC-type amino acid transport/signal transduction systems, periplasmic component/domain
CDCO157_3512	12.7083	5.74866	-1.14447	0.0199485	Putative oxidoreductase Fe-S binding subunit	Amino acid transport and metabolism	NADPH-dependent glutamate synthase beta chain and related oxidoreductases
CDCO157_3541	14.979	2.91458	-2.36158	0.00886543	Arginine/ornithine transport system ATPase; Putative periplasmic protein kinase ArgK and related GTPases of G3E family	Amino acid transport and metabolism	Putative periplasmic protein kinase ArgK and related GTPases of G3E family
CDCO157_4158	14.8091	5.76304	-1.36158	0.0463937	Dipeptide transporter ATP-binding subunit, ATPase component	Amino acid transport and metabolism	ABC-type oligopeptide transport system, ATPase component
Carbohydrate transport and metabolism
CDCO157_4684	11.2992	0	-1.79769e+308	0.00715294	Phosphotransferase system, mannose/fructose/N-acetylgalactosamine-specific component IIB	Carbohydrate transport and metabolism	Phosphotransferase system, mannose/fructose/N-acetylgalactosamine-specific component IIB
CDCO157_3754	14.403	4.56731	-1.65695	0.0406625	Phosphotransferase system, mannose/fructose/N-acetylgalactosamine-specific component IID	Carbohydrate transport and metabolism	Phosphotransferase system, mannose/fructose/N-acetylgalactosamine-specific component IID
CDCO157_3560	48.2144	6.55711	-2.87833	0.00761768	Predicted mannitol-specific enzyme IIA component of PTS	Carbohydrate transport and metabolism	Phosphotransferase system mannitol/fructose-specific IIA domain (Ntr-type)
Lipid transport and metabolism
CDCO157_4511	11.7768	3.20065	-1.87951	0.0190884	Acetyl-CoA acetyltransferase	Lipid transport and metabolism	Acetyl-CoA acetyltransferase
CDCO157_2829	70.1449	34.8862	-1.00768	0.0175553	Membrane-associated phospholipid phosphatase	Lipid transport and metabolism	Membrane-associated phospholipid phosphatase
Inorganic ion transport and metabolism
CDCO157_1900	15.2513	7.65563	-0.994339	0.0276949	yncD; putative outer membrane receptor for iron	Inorganic ion transport and metabolism	Outer membrane receptor proteins, mostly Fe transport
Energy production and conversion
CDCO157_3643	50.8024	21.629	-1.23193	0.000474361	Fe-S oxidoreductase	Energy production and conversion	Fe-S oxidoreductase
CDCO157_2169	25.9423	6.17175	-2.07156	0.0228687	Predicted NADH:ubiquinone oxidoreductase; subunit RnfA; electron transport complex protein	Energy production and conversion	Predicted NADH:ubiquinone oxidoreductase, subunit RnfA
CDCO157_2173	32.6012	13.0291	-1.32319	0.0381279	Predicted NADH:ubiquinone oxidoreductase; subunit RnfG	Energy production and conversion	Predicted NADH:ubiquinone oxidoreductase, subunit RnfG
CDCO157_4738	47.5473	14.8963	-1.67441	0.00276278	formate-dependent nitrite reductase NrfC; Fe-S centers	Energy production and conversion	Fe-S-cluster-containing hydrogenase components 1
CDCO157_3113	17.0111	3.46847	-2.2941	0.0370659	hydrogenase 4 membrane subunit hyfE	Energy production and conversion	Hydrogenase 4 membrane component (E)
CDCO157_2241	18.3251	0	-1.79769e+308	0.0416323	Ferredoxin-like protein	Energy production and conversion	Ferredoxin-like protein
Cell motility
CDCO157_3977	21.1301	0	-1.79769e+308	0.000155745	Putative fimbrial assembly protein; Tfp pilus assembly protein PilN	Cell motility	Tfp pilus assembly protein PilN
CDCO157_0997	28.4773	6.77528	-2.07146	0.022875	Putative fimbrial-like protein; P pilus assembly protein, pilin FimA	Cell motility	P pilus assembly protein, pilin FimA
Coenzyme transport and metabolism
CDCO157_3870	24.5455	11.6734	-1.07224	0.0171657	sodium/panthothenate symporter panF	Coenzyme transport and metabolism	Na+/panthothenate symporter
CDCO157_4657	15.0959	1.79552	-3.07168	0.0407958	thiamine-phosphate pyrophosphorylase thiE	Coenzyme transport and metabolism	Thiamine monophosphate synthase
Cell wall/membrane/envelope biogenesis
CDCO157_1350	18.8758	2.44875	-2.94642	0.00624953	Curli production assembly/transport component CsgG	Cell wall/membrane/envelope biogenesis	Uncharacterized protein involved in formation of curli polymers
CDCO157_2659	18.553	8.82377	-1.07218	0.0361198	multidrug efflux system subunit MdtA	Cell wall/membrane/envelope biogenesis	Membrane-fusion protein
General function prediction only
CDCO157_5020	44.669	19.3208	-1.20912	0.0272449	hyperosmotically inducible periplasmic protein OsmY	General function prediction only	Predicted periplasmic or secreted lipoprotein
Posttranslational modification, protein turnover, chaperones
CDCO157_4362	76.0762	31.5418	-1.27018	0.0262351	Heat shock chaperone IbpB	Posttranslational modification, protein turnover, chaperones	Molecular chaperone (small heat shock protein)
CDCO157_2853	72.2517	35.6257	-1.02011	0.0237305	Cytochrome c biogenesis ATP-binding export protein CcmA; Heme exporter protein A	Posttranslational modification, protein turnover, chaperones	ABC-type transport system involved in cytochrome c biogenesis, ATPase component
Replication, recombination and repair
CDCO157_3874	17.4469	5.65828	-1.62454	0.0265866	Putative adenine-specific DNA-methyltransferase	Replication, recombination and repair	DNA modification methylase
Secondary metabolites biosynthesis, transport and catabolism
CDCO157_0410	20.8472	5.94983	-1.80893	0.0126388	Probable taurine catabolism dioxygenase	Secondary metabolites biosynthesis, transport and catabolism	Probable taurine catabolism dioxygenase
Signal transduction mechanisms
CDCO157_2326	15.188	6.19087	-1.29472	0.00882881	Putative serine protein kinase	Signal transduction mechanisms	Putative Ser protein kinase
CDCO157_4340	35.9851	15.3432	-1.22979	0.00269516	Sensory histidine kinase UhpB; two-component system, NarL family	Signal transduction mechanisms	Signal transduction histidine kinase, glucose-6-phosphate specific
transcriptional regulate
CDCO157_4219	35.8888	12.1302	-1.56493	0.0053934	DNA-binding transcriptional repressor LldR; GntR family transcriptional regulator, L-lactate dehydrogenase	Transcriptional regulators	Transcriptional regulators
CDCO157_3184	21.7472	7.7573	-1.4872	0.00586809	Putative NAGC-like transcriptional regulator; ROK family protein	Transcription; Transcriptional regulator/sugar kinase	Transcriptional regulator/sugar kinase
CDCO157_0649	18647.1	8022.54	-1.21682	0.000155797	cold shock protein CspE	Transcription	Cold shock proteins
CDCO157_3383	29.299	6.27335	-2.22354	0.0139914	Putative anti-terminator regulatory protein; glycerol-3-phosphate responsive antiterminator (mRNA binding)	Transcription	Glycerol-3-phosphate responsive antiterminator (mRNA-binding)
translation
CDCO157_1645	40.3256	20.8144	-0.954115	0.0421009	N5-glutamine S-adenosyl-L-methionine-dependent methyltransferase	Translation, ribosomal structure and biogenesis	Methylase of polypeptide chain release factors
others
CDCO157_1139	10.3881	0	-1.79769e+308	0.0227501	Host-nuclease inhibitor protein gam
CDCpO157_0071	117.155	0	-1.79769e+308	0.00715294	Hemolysin expression-modulating protein
CDCO157_1179	135.924	40.9486	-1.73092	0.0321869	Putative outer membrane protein
CDCO157_0886	19.9944	9.98354	-1.00197	0.0129818	Conserved inner membrane protein yliE		FOG: EAL domain
CDCO157_2332	43.0673	3.23678	-3.73396	0.012091	Predicted membrane protein		Predicted membrane protein
CDCO157_3287	51.4789	19.1764	-1.42465	0.0358817	LysM domain/BON superfamily protein		Uncharacterized protein containing LysM domain
CDCO157_2943	69.8667	24.9409	-1.48609	0.0124585	Inner membrane protein		Uncharacterized protein conserved in bacteria
CDCO157_1901	10.6767	2.68839	-1.98965	0.0297283	Putative receptor		Uncharacterized conserved protein
CDCO157_4567	20.0957	0	-1.79769e+308	0.0227501	L-rhamnose mutarotase yiiL		Uncharacterized conserved protein
CDCO157_1361	31.6038	14.4942	-1.12462	0.0130531	Glucans biosynthesis mdoC
CDCO157_0595	43.3632	0	-1.79769e+308	0.000782701	Cu(I)/Ag(I) efflux system periplasmic protein CusF		Uncharacterized conserved protein
CDCO157_3975	16.5443	0	-1.79769e+308	0.00715294	Pilus assembly protein HofP
CDCO157_0274	28.3749	11.756	-1.27122	0.0261123	Putative tail fiber protein
CDCO157_2969	63.3202	30.1173	-1.07207	0.00642278	Flagella biosynthesis regulator flk
CDCO157_3192	20.7923	10.0989	-1.04186	0.0272503	Putative transglycosylase; Predicted soluble lytic transglycosylase fused to an ABC-type amino acid-binding protein		Predicted soluble lytic transglycosylase fused to an ABC-type amino acid-binding protein
CDCO157_1804	110.132	0	-1.79769e+308	0.00407549	peripheral inner membrane phage-shock protein pspD
function unknown
CDCO157_3093	10.9075	0	-1.79769e+308	7.19649e-05	Hypothetical protein
CDCO157_0761	15.7203	0	-1.79769e+308	0.0126737	Conserved hypothetical protein
CDCpO157_0040	16.3332	0	-1.79769e+308	0.0416323	Hypothetical protein
CDCO157_3436	19.0085	0	-1.79769e+308	0.00407549	Hypothetical protein
CDCO157_0635	26.646	0	-1.79769e+308	0.0016038	Hypothetical protein
CDCO157_4726	27.6881	0	-1.79769e+308	0.0227501	Hypothetical protein
CDCO157_2059	28.7121	0	-1.79769e+308	0.0416323	Hypothetical protein
CDCO157_0602	31.141	0	-1.79769e+308	0.0416323	Hypothetical protein
CDCO157_2495	31.8205	0	-1.79769e+308	0.00407549	Hypothetical protein
CDCO157_1513	33.9035	0	-1.79769e+308	0.0416323	Hypothetical protein
CDCO157_1532	34.6101	0	-1.79769e+308	0.0126737	Hypothetical protein
CDCO157_0453	43.8856	16.2422	-1.434	0.0233896	Hypothetical protein
CDCO157_0298	47.1994	0	-1.79769e+308	0.0416323	Hypothetical protein
CDCO157_0229	59.8198	0	-1.79769e+308	0.0227501	Hypothetical protein
CDCO157_2176	93.2379	0	-1.79769e+308	0.0227501	Hypothetical protein
CDCO157_1470	116.009	0	-1.79769e+308	0.00407549	Hypothetical protein
